# Supplementary material for: Tracking the interfacial charge transfer behavior of hydrothermally synthesized ZnO nanostructures via complementary electrogravimetric methods
Source: Royal Society of Chemistry journal article supplement (doi:10.1039/c8cp03593h), 2018-01-01
Supplement: c8cp03593h1.pdf [file c8cp03593h1.pdf]

## Supporting Information

### Tracking interfacial charge transfer behavior of hydrothermally synthesized ZnO nanostructures via complementary electrogravimetric methods

Wanli Gao<sup>a</sup>, Hubert Perrot<sup>a,\*</sup>, Ozlem Sel<sup>a,\*</sup>

<sup>a</sup> Sorbonne Université, CNRS, UMR 8235, LISE, F-75005, Paris, France.

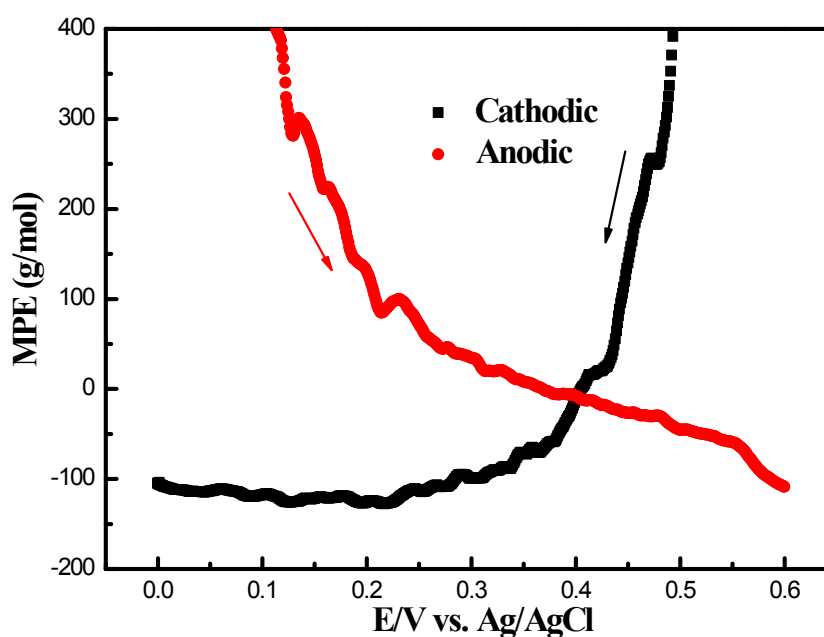

Fig. S1 MPE calculated from CV curve at a scan rate of 50 mV/s.
